# Supplementary material for: One-pot synthesis of CdxZn1−xS–reduced graphene oxide nanocomposites with improved photoelectrochemical performance for selective determination of Cu2+
Source: Royal Society of Chemistry journal article supplement (doi:10.1039/c3ra41118d), 2013-01-01
Supplement: c3ra41118d.pdf [file c3ra41118d.pdf]

Electronic Supplementary Information

**One-pot synthesis of  $\text{Cd}_x\text{Zn}_{1-x}\text{S}$ /reduced graphene oxide  
nanocomposites with improved photoelectrochemical performance  
for selective determination of  $\text{Cu}^{2+}$**

Jiajia Yan, Kun Wang,\* Qian Liu, Jing Qian, Xiaoya Dong, Wei Liu and Baijing Qiu

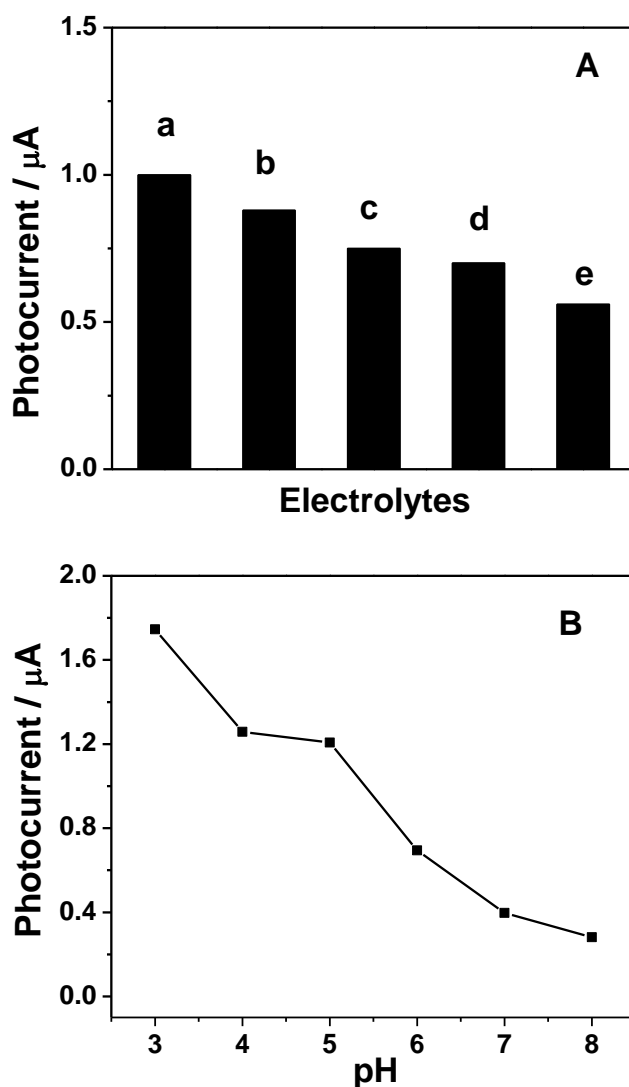

Fig. S1. (A) The photocurrent response of  $\text{Cd}_{0.5}\text{Zn}_{0.5}\text{S}/\text{rGO}/\text{GCE}$  in different buffer solution (0.1 M, pH 5.0): (a) PBS, (b) HAc-NaAc, (c) B-R, (d) Mcilvaine and (e) Tris-HCl. (B) The photocurrent response of  $\text{Cd}_{0.5}\text{Zn}_{0.5}\text{S}/\text{rGO}/\text{GCE}$  in 0.1 M PBS with different pH values.

PBS was selected according to the PEC performance of  $\text{Cd}_{0.5}\text{Zn}_{0.5}\text{S}/\text{rGO}/\text{GCE}$  in different buffer solution. As shown in Fig. S1A, the  $\text{Cd}_{0.5}\text{Zn}_{0.5}\text{S}/\text{rGO}/\text{GCE}$  showed the optimum PEC performance in 0.1 M PBS than the other electrolytes. Thus, 0.1 M PBS was chosen as the electrolyte in our work.

In addition, the photocurrent intensity of  $\text{Cd}_{0.5}\text{Zn}_{0.5}\text{S}/\text{rGO}/\text{GCE}$  in 0.1 M PBS with different pH values was discussed and showed in Fig. S1B. Under the alkaline condition, the photocurrent intensity of  $\text{Cd}_{0.5}\text{Zn}_{0.5}\text{S}/\text{rGO}/\text{GCE}$  was very weak. While in the acidic solution, the photocurrent intensity of  $\text{Cd}_{0.5}\text{Zn}_{0.5}\text{S}/\text{rGO}/\text{GCE}$  was much higher than that under alkaline condition. When the pH value was 3.0, the photocurrent intensity of  $\text{Cd}_{0.5}\text{Zn}_{0.5}\text{S}/\text{rGO}/\text{GCE}$  achieved 1.7  $\mu\text{A}$ , which was only 0.4  $\mu\text{A}$  higher than that in the PBS with a pH value of 5.0. In order to obtain a moderate experimental condition and acceptable photocurrent intensity, the PBS with a pH value of 5.0 was chosen to conduct the PEC measurements.

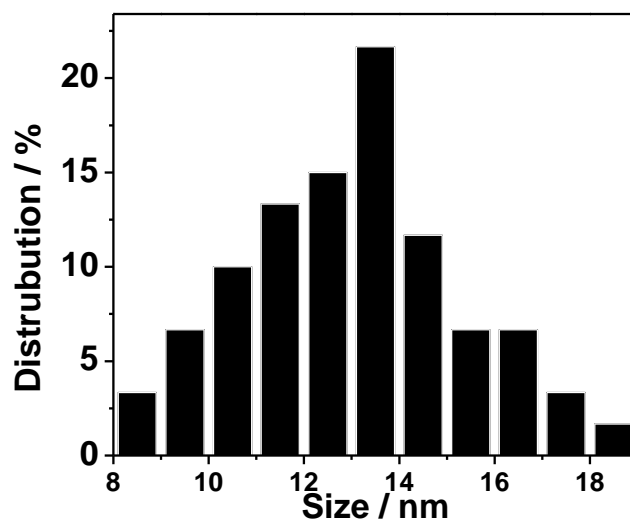

**Fig. S2.** The histogram of size distribution of  $\text{Cd}_{0.5}\text{Zn}_{0.5}\text{S}$  in the  $\text{Cd}_{0.5}\text{Zn}_{0.5}\text{S}/\text{rGO}$  nanocomposite.

Table S1. The photocurrent response of different semiconducting materials.

| Modified Materials                                  | Photocurrent Intensity / $\mu\text{A}$ | Reference |
|-----------------------------------------------------|----------------------------------------|-----------|
| $\text{Cd}_{0.5}\text{Zn}_{0.5}\text{S}/\text{rGO}$ | 1.0                                    | This work |
| CdS QDs                                             | 0.7                                    | 34        |
| CdTe QDs                                            | 0.1                                    | 35        |
| CdSe/ZnS QDs                                        | 0.008                                  | 36        |
| CdS                                                 | 0.25                                   | 37        |
| ZnS                                                 | 0.55                                   | 37        |
| ZnO                                                 | 0.6                                    | 38        |

Table S2. Performance comparison of the PEC method for the determination of  $\text{Cu}^{2+}$  with other methods.

| Method                                    | Linear Range  | Detection Limit | Reference |
|-------------------------------------------|---------------|-----------------|-----------|
|                                           | $\mu\text{M}$ | $\mu\text{M}$   |           |
| Photoelectrochemical<br>Analysis          | 0.02-20       | 0.0067          | This work |
| Photoelectrochemical<br>Analysis          | 0.08-100      | 0.0059          | 35        |
| Photoelectrochemical<br>Analysis          | 0.02-40       | 0.01            | 39        |
| Fluorescence Resonance<br>Energy Transfer | 0.16-2.87     | 0.16            | 40        |
| Voltammetry                               | 0.075-2.5     | 0.031           | 41        |
| Atomic Absorption Spectra                 | 0.2-10        | 0.2             | 42        |
| Potentiometric Method                     | 0.1-10000     | 0.08            | 43        |
